# Supplementary material for: A comparison of methods to measure central and peripheral oxytocin concentrations in human and non-human primates
Source: PubMed Central journal article supplement (PMC5722864; doi:10.1038/s41598-017-17674-7), 2017-12-08
Supplement: 41598_2017_17674_MOESM1_ESM.pdf [file 41598_2017_17674_MOESM1_ESM.pdf]

## Supplementary results

### **A comparison of methods to measure central and peripheral oxytocin concentrations in human and non-human primates**

Arthur Lefevre<sup>1,2,\*</sup>, Raphaëlle Mottolese<sup>1,2</sup>, Manon Dirheimer<sup>1</sup>, Carmine Mottolese<sup>1,3</sup>, Angela Sirigu<sup>1,2</sup>

<sup>1</sup> Institut des Sciences Cognitives Marc Jeannerod, UMR 5229, Centre National de la Recherche Scientifique, Bron, France.

<sup>2</sup> Université Claude Bernard Lyon 1, Lyon, France.

<sup>3</sup> Neurosurgery Unit 500, Hôpital Pierre Wertheimer, Hospices Civils de Lyon, Lyon, France.

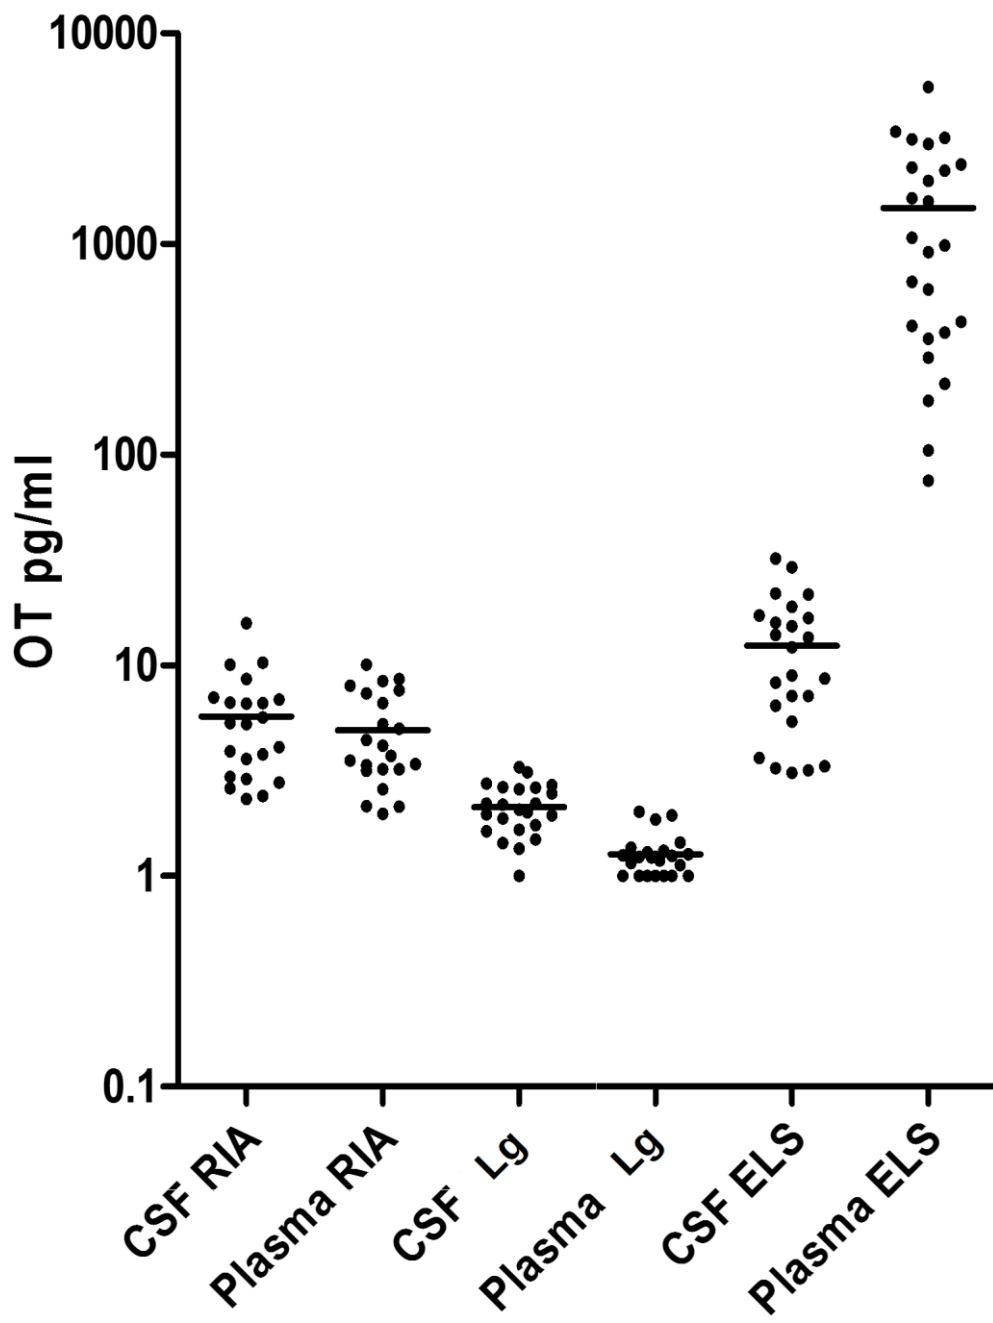

**Figure S1.** Individual values of OT concentration on a logarithmic scale for each CSF and plasma samples assayed with the 3 methods. Black bars represent the mean.

**Table S1.** Mean and standard deviations of plasma and CSF OT concentrations obtained with the three different methods for females and males. Mann Whitney U tests Z statistic and p values (Bonferroni corrected for multiple comparisons,  $p*6$ ).

|                 |             | CSF<br>RIA | Plasma<br>RIA | CSF<br>Lg | Plasma<br>Lg | CSF<br>ELS | Plasma<br>ELS |
|-----------------|-------------|------------|---------------|-----------|--------------|------------|---------------|
| Females         | Mean        | 6.48       | 5.41          | 2.10      | 1.40         | 15.10      | 1719.06       |
|                 | SD          | 3.83       | 2.89          | 0.52      | 0.37         | 9.48       | 1599.94       |
| Males           | Mean        | 4.86       | 4.32          | 2.16      | 1.15         | 9.71       | 1235.93       |
|                 | SD          | 2.43       | 1.76          | 0.66      | 0.16         | 6.02       | 1133.38       |
| Mann<br>Whitney | Z           | 0.99       | 0.86          | -0.49     | 1.88         | 1.41       | 0.38          |
|                 | P corrected | > 0.1      | > 0.1         | > 0.1     | > 0.1        | > 0.1      | > 0.1         |

**Table S2.** Pearson coefficients of correlation between OT concentrations and confounding variables. Delay refers to the time between sampling and storage to  $-80^{\circ}$ . Storage refers to the duration of storage. None of them reached statistical significance (all  $p > 0.1$ , corrected  $p = p*6$ ).

|         | CSF<br>RIA | Plasma<br>RIA | CSF<br>Lg | Plasma<br>Lg | CSF<br>ELS | Plasma<br>ELS |
|---------|------------|---------------|-----------|--------------|------------|---------------|
| Age     | 0.34       | -0.12         | -0.09     | 0.39         | 0.34       | 0.50          |
| Height  | -0.27      | -0.32         | 0.32      | -0.39        | -0.33      | -0.18         |
| Weight  | -0.08      | 0.25          | 0.16      | -0.37        | -0.14      | -0.29         |
| Delay   | 0.03       | 0.01          | 0.40      | 0.00         | -0.28      | -0.31         |
| Storage | -0.03      | -0.31         | 0.15      | 0.23         | 0.53       | 0.55          |

**Table S3.** Effects of confounding factors anaesthetics, time of sampling and location of sampling on OT concentrations, analysed with Mann Whitney U test (Z) or Kruskal Wallis ANOVA (H). All  $p > 0.1$ .

|              |   | CSF RIA | Plasma RIA | CSF Lg | Plasma Lg | CSF ELS | Plasma ELS |
|--------------|---|---------|------------|--------|-----------|---------|------------|
| Anaesthetics | Z | -0.83   | -0.04      | 1.07   | -0.50     | -0.43   | -0.82      |
| Time         | H | 2.17    | 1.54       | 6.31   | 6.18      | 2.66    | 3.02       |
| Location     | H | 3.01    | 4.80       | 1.02   | 1.40      | 1.50    | 0.78       |
